# Supplementary material for: Preoperative fluid removal volume in patients on dialysis undergoing cardiovascular surgery
Source: Research Square preprint supplement (doi:10.21203/rs.3.rs-8264468/v1), 2026-01-12
Supplement: Supplementary file 1 [file 8d971b0f193ff02a0a54451a.xlsx]

## Sheet: Sheet1
Age (year)	Height (cm)	Weight (kg)	Sex (0：female、1：male）	Diagnosis	Surgical procedure	Urgency of surgery (0: elective surgery, 1: emergency surgery)	Preoperative EF (%)	HT (0: None, 1: Present)	DM (0: None, 1: Present)	Peripheral vascular disorder (0: absent, 1: present)	Cerebrovascular disease (0: absent, 1: present)	History of PCI (0: None, 1: Present)	Antiplatelet medication (0: none taken, 1: taken)	Anticoagulants (0: none taken, 1: taken)	Preoperative af (0: absent, 1: present)	Preoperative dry weight (kg)	Preoperative fluid removal (ml)	Preoperative fluid removal (ml/kg)	Preoperative dialysis (0: None, 1: Yes)	Hypotension during dialysis (0: None, 1: Present)	Preoperative beta-blocker (0: none taken, 1: taken)	Preoperative TP (g/dl)	Preoperative BUN (mg/dl)	Preoperative Cre (mg/dl)	Preoperative K (mmol/L)	Preoperative Ht (%)	Preoperative Hb (g/dl)	Preoperative CTR (％）	Dialysis history (years)	P/F (anesthesia induction）	Surgery duration (minutes)	Anesthesia duration (minutes)	Cardiopulmonary bypass time (minutes)	Aortic occlusion time (minutes)	Total fluid and blood transfusion volume (ml)	Self-collected blood return volume (ml)	RCC (ml)	FFP (ml)	Albumin preparation (ml）	PC (ml)	Self-collected blood return volume (ml)	Urine volume (ml)	Intraoperative hypotension (SBP < 80, lasting ≥5 min; 0: none, 1: present pre-CPB or during anesthesia management)	Intraoperative DOA (mg）	Intraoperative DOB (mg)	Intraoperative NA (mg)	Intraoperative DOA (mg/kg/min)	Intraoperative DOB (mg/kg/min)	Postoperative TP (g/dl)
73	160	59.6	1	AS、IHD	AVR、CABG-１	0	70	0	1	1	0	0	0	0	0	59.1	1400	23.4899	1	1	0	8.7	30.5	7.2	4.6	46.5	15.5	51	8	272	287	415	168	117	2861	0	0	0	500	0	733	0	0	24	35	0.337	0.000970324	0.00141506	5.1
70	163	56.6	1	IHD	On-pump beating CABG3	1	55	0	1	1	1	1	1	0	0	56.5	1600	28.2686	0	1	1	6.5	24.9	6.25	4	40.8	13.4	52	38	180	351	444	151	0	2520	0	280	0	0	0	798	0	0	31	22	1.405	0.00123357	0.000875434	3.2
65	166	59.3	1	MR、TR	MVR、TAP、LAAC	0	34	1	1	0	1	1	1	0	0	59.3	2400	40.4722	1	1	1	6.8	44	9.47	4.5	43.1	14.1	56	10	445	846	992	580	244	7048	14100	280	1240	0	400	1263	0	1	76	158	4.115	0.00129195	0.00268591	3.2
81	152	46.9	1	MR、TR、af	MAP、TAP、LAAC、LAP	0	70	0	0	0	0	0	0	0	1	45.6	1100	23.4542	1	1	0	6.9	26.3	5.39	3.9	31.6	10.7	64	1	421	350	451	182	113	5440	0	1120	660	250	50	1616	0	0	46	46	0.305	0.00217475	0.00217475	3.9
74	161	49.6	1	MR、TR	MVR,TAP	0	64	1	0	0	1	0	0	1	0	49.5	700	14.1129	1	1	1	6.6	32.1	7.06	4.6	35	10.6	50	18	330	373	476	162	82	4776	0	0	480	0	200	1319	0	0	37	70	1.694	0.00156716	0.0029649	4
74	162	60	1	MR、TR、IHD、af	MVR、TAP、CABG-1、Maze、LAAC	0	40	1	0	0	0	1	1	0	1	61	1600	26.6667	1	0	1	6.3	29.3	7.75	4.3	29.2	9.6	59	14	217	420	537	256	191	3172	0	840	680	0	0	632	0	0	60	60	0.886	0.0018622	0.0018622	4.4
56	148	57.3	0	AR	AVR	0	57	1	0	0	0	0	0	0	0	57.3	1200	20.9424	1	1	0	7.4	34.6	7.23	4.6	41.3	13.2	54	2	379	257	349	139	98	1904	0	560	240	0	0	161	0	0	18	18	0.198	0.000900104	0.000900104	4.3
82	161	67.5	1	IHD、AS	AVR、CABG-2	1	58	1	1	1	1	0	1	0	0	67.4	1800	26.6667	1	0	0	6.4	42	8.37	4.9	36.4	11.6	53	4	364	382	505	189	113	4397	6250	560	960	0	0	961	0	0	49	49	0.617	0.00143748	0.00143748	4.5
83	144	39.8	0	AS、IHD	AVR	0	69	1	1	1	1	0	1	0	0	39.7	1800	45.2261	1	0	0	6.9	32.3	4.5	3.5	38.1	12.6	53	1	506	293	416	126	72	3243	0	560	480	0	0	950	0	1	18	18	0.088	0.00108717	0.00108717	4.5
77	159	57.5	1	IHD、AS	AVR、CABG-2	0	40	0	1	0	1	1	1	0	0	55	2400	41.7391	1	1	0	6.2	29.2	3.87	3.8	34.9	11.3	54	5	417	462	611	245	143	4850	0	1120	1440	0	200	1665	0	0	38	38	0.808	0.00108162	0.00108162	4.8
72	150	59.2	1	AS、IHD、af	AVR、CABG-1、PVI、LAAC	0	72	0	0	0	1	1	1	0	1	59.2	600	10.1351	1	0	0	7.2	27.7	8.7	4.3	38.1	11.2	60	30	423	335	438	159	79	2700	0	560	580	0	0	1207	0	0	23	23	1.325	0.000887017	0.000887017	4.6
73	168	61.7	1	AS	AVR、LAAC	0	65	1	0	0	0	0	0	0	0	61.7	2400	38.8979	1	1	0	6.6	70.5	12.21	5.2	36	11.6	53	2	457	292	401	169	85	2279	0	0	0	500	0	551	0	0	16	16	0.213	0.000646682	0.000646682	4.7
53	178	78.4	1	AR	AVR、LAAC	0	50	1	0	0	0	0	0	0	0	78.5	200	2.55102	1	0	0	5.8	68.4	13.99	4.8	39.3	12.6	53	1	587	257	353	124	82	885	15	0	0	0	0	1667	15	0	31	31	0	0.00112014	0.00112014	3.7
70	154	42.5	1	AR、AS	AVR、LAAC	0	49	1	0	0	1	0	1	0	0		2300	54.1176	1	0	0	5.9	64.1	6.98	4.4	32.1	11	56	20	492	248	356	128	85	2923	0	840	480	250	0	803	0	0	23	31	1.103	0.00152016	0.00204891	4.7
78	149	42	0	AR、AS、IHD	AVR、CABG-1	0	74	1	0	1	1	0	0	0	0	42	700	16.6667	1	0	1	6.5	11.1	2.96	3.8	36.6	11.8	53	11	445	302	411	162	117	2749	0	280	960	0	0	859	0	0	37	37	0.24	0.00214344	0.00214344	4.5
67	166	49	1	AR、AS、IHD、af	AVR、CABG-2、PVI、LAAC	0	45	1	0	0	0	1	0	0	0		900	18.3673	1	0	0	6.8	28.1	6.6	3.7	26.8	8.5	62	22	277	401	500	199	142	3635	0	1400	600	0	200	1241	0	0	42	42	1.223	0.00171429	0.00171429	4.8
59	174	79.3	1	IHD	CABG-2	0	32	0	1	0	0	0	1	0	0	79.3	1400	17.6545	1	1	0	5.6	74.4	10.7	3.6	27	8.8	57	5	354	280	391	81	0	2847	0	840	480	0	0	874	0	0	9	1.3	0.43	0.000290264	4.1927e-05	4.3
58	167	68.4	1	IHD	CABG-2	0	40	1	1	1	1	0	1	0	0	68.3	1800	26.3158	1	0	0	7.2	14	59.6	4.5	33.9	11.7	45	11	557	364	469	120	0	6787	0	840	480	1100	0	1782	0	0	30	30	1.017	0.000935174	0.000935174	3.4
73	159	38.6	1	IHD	CABG-3	0	31	1	0	0	1	0	1	0	0	38.5	1200	31.0881	1	1	1	6.4	29.5	6.5	3.9	36.1	11.5	49	14	520	311	432	86	0	4997	0	840	0	1250	0	777	0	1	47	47	1.893	0.00281856	0.00281856	4.2
64	160	47.2	0	TR	TVP、CABG-1、Maze、PVI、LAA closure、ASD closure	0	60	1	1	1	1	1	1	1	0	47.2	2000	42.3729	1	0	1	6.5	17.6	5.15	3.6	32.9	10.7	64	11	387	508	625	273	0	6527	0	1680	1920	200	200	1527	0	0	146	109	1.462	0.00494915	0.00369492	5
51	177	74	1	IE	MVR	0	75	1	1	0	1	0	0	0	0	75	2300	31.0811	1	1	0	5.4	69	12.87	4.7	20.1	6.6	59	9	180	314	454	225	116	3150	0	720	480	0	0	1654	0	0	67	62	0.84	0.00199429	0.00184546	4.5
82	153	43.6	0	IHD	CABG-４	1		1	1	0	1	0	1	0	0	43.3	2100	48.1651	0	1	0	7.1	54.3	8.51	5.1	38	12	59	3	492	379	500	203	0	4713	15	1120	960	375	0	3418	15	0	72	71	2.186	0.00330275	0.00325688	4.5
72	162	45	0	AS	AVR、TVP	0	59	0	0	0	1	0	0	1	1	45.5	1000	22.2222	1	1	0	7.5	44.5	7.33	4.2	30.8	9.4	64	12	445	373	486	200	152	4040	0	1120	960	0	200	990	0	0	30	33	0.429	0.00137174	0.00150892	5.4
64	167	49.1	1	AAAD	Aortic Aneurysm Endoprosthesis Replacement (Thoracic Aorta)	1	61	1	0	0	0	0	0	0	0	49.5	2000	40.7332	1	0	0	7.5	50.9	8.83	5.4	32.9	10.5	57	5	398	287	365	187	92	6180	0	3360	1060	0	200	1224	0	0	6	5	0.554	0.000334793	0.000278995	4.3
54	177	77.5	1	IHD	OPCAB	0	55	1	1	0	0	0	1	0	0	77.6	1100	14.1935	1	1	0	7.4	43.8	7.87	5	33.3	10.8	47	1	453	197	306	0	0	2415	0	0	0	0	0	125	80	0	11	11	0.478	0.000463841	0.000463841	5.6
49	168	66.9	1	IHD	OPCAB	0	51	1	1	0	1	0	0	0	0	67	1800	26.9058	1	1	0	7.3	42.5	10.06	4.8	30.1	10	43	3	423	216	388	0	0	2280	20	280	0	500	0	404	20	0	10	7	0.521	0.00038525	0.000269675	6.1
48	168	74.1	1	IHD	OPCAB	0	69	1	1	1	0	0	1	0	0	74.1	2200	29.6896	1	1	0	6.7	63.7	11.61	4.7	41.1	12.6	57	5	289	345	444	0	0	4144	0	0	0	750	0	767	0	0	43	11	1.222	0.00130697	0.000334342	4.8
54	174	62	1	AS、MS	AVR、MVR	0	67	1	1	0	0	0	1	0	0	62.5	1600	25.8065	1	0	1	7.1	24.2	8.99	4.4	36	10.8	52	3	134	512	610	399	311	3160	0	560	1000	0	0	1400	0	0	56	56	0.666	0.0014807	0.0014807	4.3
71	150	58.1	0	AS	AVR	0	66	1	1	0	1	0	0	0	0	57.5	600	10.327	1	1	1	7.5	33.3	6.62	4.6	37.8	11.5	45	2	395	362	584	77	50	7631	0	1400	2400	400	400	2081	0	1	117	113	0.582	0.00344824	0.00333035	5.1
70	153	39.3	1	IHD、AS	AVR、CABG-１	0	27	1	0	1	0	0	1	0	0	39	1800	45.8015	1	1	1	6.5	46.8	7.15	5.5	44.4	14.8	47	5	379	277	367	171	139	1150	0	0	0	0	0	1212	0	0	46	39	0	0.00318933	0.002704	3.4
68	162	58.3	1	AS	AVR	0	78	1	0	0	1	0	0	1	1	58.3	1700	29.1595	1	1	1	6	58.9	13.57	5.2	31.4	9.9	50	2	482	265	365	140	85	1650	0	280	250	0	0	1298	0	0	36	37	0	0.00169177	0.00173876	4.4
65	165	77.4	1	AS	AVR、CABG-１	1	27	1	1	0	0	0	0	0	0		2880	37.2093	1	1	0	5.8	38.6	1.57	4.9	26.8	8.7	75	0	379	336	440	158	91	3260	80	560	800	0	200	500	80	0	68	118	0.42	0.00199671	0.00346488	5
44	163	65.1	1	IHD	CABG-2	0	35	1	0	0	1	0	0	1	0	65.1	3700	56.8356	1	1	1	7.6	26.2	10.06	5	42.1	13.4	52	4	400	372	491	179	0	7110	0	560	1100	1750	0	1976	0	0	60	50	1.225	0.00187711	0.00156425	5.5
68	170	55.8	1	AS	AVR	0	45	1	0	0	0	0	0	0	0		2000	35.8423	1	1	0	6.7	40.6	13.5	4.3	38.5	12.6	62	5	379	366	439	256	172	1704	0	0	0	50	0	1444	0	0	35	35	0	0.00142879	0.00142879	3.7
71	157	46.6	0	AS	AVR、CABG-１	0	75	0	0	0	0	0	1	0	0	46.5	800	17.1674	1	1	0	5.9	48	9.25	4.1	29.2	10	58	20	364	436	549	123	86	11040	0	1500	2400	2350	400	2580	0	0	74	36	0.049	0.0028925	0.00140716	5.1
63	174	53.6	1	AR	AVR	0	47	1	0	0	0	0	1	0	0	53.6	2750	51.306	1	0	1	6.5	46.7	7.1	4.3	36.5	12.3	47	9	602	253	333	143	97	2355	0	0	0	0	0	1271	0	0	24	24	0.013	0.00134463	0.00134463	4.3
69	148	41.8	0	AS、IHD	AVR、CABG-2	1	68	1	0	0	0	0	1	0	0	40	2400	57.4163	1	1	0	6.7	32.4	7.13	3.2	27.2	8.6	56	20	316	388	489	226	161	4272	0	560	960	0	400	1282	0	0	22	22	0	0.00107631	0.00107631	5.2
69	171	61.3	1	IHD	CABG-1	1		1	1	0	1	0	1	0	0	58.4	960	15.6607	1	0	1	6.6	45.3	6.86	4.2	31.8	10.7	60	1	289	658	753	158	0	5960	140	1400	0	1700	200	1915	140	1	137	79	1.1	0.00296801	0.00171148	3.2
63	161	52.3	1	AR、MS、MR	AVR,MVR	0	57	1	0	0	1	0	0	1	1	52.3	2000	38.2409	1	0	0	6.5	59	11.41	4.1	34.1	11.4	63	32	423	495	593	306	253	2510	0	0	0	750	0	1582	0	1	38	43	0	0.00122526	0.00138648	4.3
77	155	59.1	1	AS	AVR	0	62	1	0	0	1	0	0	0	0	59.6	1300	21.9966	0	1	0	6.4	40.7	12.16	4.7	34.3	11.7	48	7	315	325	432	177	113	2460	0	0	0	750	0	1177	0	1	28	28	0	0.0010967	0.0010967	4.3
81	144	40.5	0	AS	AVR	0	61	1	0	0	0	0	0	0	0	40.5	1600	39.5062	1	1	0	5.9	67.8	8.73	4.5	33.2	10.4	77	5	420	274	356	151	88	1678	8	0	0	0	0	932	8	0	33	28	0	0.00228881	0.00194202
68	168	64.6	1	IHD	OPCAB	0	62	0	0	0	0	0	1	0	0		1000	15.4799	1	0	0	6.1	64.2	10.52	4.4	33.1	11.4	55	3	397	318	417	0	0	4214	0	560	0	1000	0	754	0	1	72	15	1.038	0.00267278	0.00055683	4.7
69	147	51.6	0	IHD	OPCAB	0	60	1	0	0	1	0	1	0	0	51.5	800	15.5039	1	0	1	6.2	58.7	10.73	3.7	34	10.5	53	3	439	231	311	0	0	1645	0	0	0	400	0	527	0	0	31	12	0.033	0.00193175	0.000747775	5.9
62	167	63.4	1	IHD	OPCAB	0	60	1	1	0	0	0	1	0	0	63.5	3000	47.3186	1	1	1	6.4	48.8	9.72	4.6	28.7	8.4	54	10	470	331	459	0	0	3900	0	700	100	1000	0	1017	0	1	58	20	0.843	0.00199309	0.000687271	5.6
72	161	59.5	1	IHD	OPCAB	0	66	1	1	0	0	1	1	1	0	59.5	800	13.4454	1	0	1	8.5	63.6	7.83	4.3	34	11.2	46	1	285	278	354	0	0	4685	250	280	900	1000	0	750	250	0	32	4	0.221	0.00151925	0.000189906	6.1
78	161	57.9	1	IHD	OPCAB	0	50	1	0	0	0	1	1	0	0		600	10.3627	1	1	0	8.3	42.7	10.31	4.4	38.4	12.7	53	2	408	224	309	0	0	3070	0	280	0	1000	0	200	0	1	53	23	0.678	0.00296237	0.00128556	6
80	141	36.8	0	IHD	OPCAB	0	32	1	1	0	1	0	0	0	0	36.5	1010	27.4457	0	1	0	7.1	47.9	7.6	3.8	32.8	10.9	51	4	441	342	471	0	0	2462	0	560	0	750	0	511	0	1	81	46	1.104	0.00467322	0.00265393	5.4
65	160	43.9	1	IHD	OPCAB	0	62	0	1	0	0	0	1	0	0	43.8	2900	66.0592	1	1	0	6.8	59.1	9.58	6.5	36.1	11.9	46	13	498	241	335	0	0	2510	0	0	0	750	0	620	0	1	53	25	0.32	0.00360385	0.00169993	5.3
79	159	46.9	1	IHD	OPCAB	0		1	0	0	0	0	1	0	0	47	800	17.0576	1	0	0	6.9	39.1	9.29	3.5	29.1	9.7	50	15	423	258	344	0	0	1391	0	285	0	0	0	681	0	1	32	0	0	0.00198344	0	5.5
62	159	57.5	1	IHD	OPCAB	0	66	1	0	1	1	0	1	0	0	57.6	2300	40	1	0	0	6.7	46	10.56	4.5	32.1	10.2	54	25	266	328	399	0	0	2975	0	0	0	750	0	505	0	1	49	7	0.584	0.00213577	0.000305111	6
[truncated: 27 more columns]
